# Supplementary material for: Event-Related Potentials in Assessing Visual Speech Cues in the Broader Autism Phenotype: Evidence from a Phonemic Restoration Paradigm
Source: MDPI journal article supplement (doi:10.3390/brainsci13071011), 2023-06-30
Supplement: s1 [file s1]

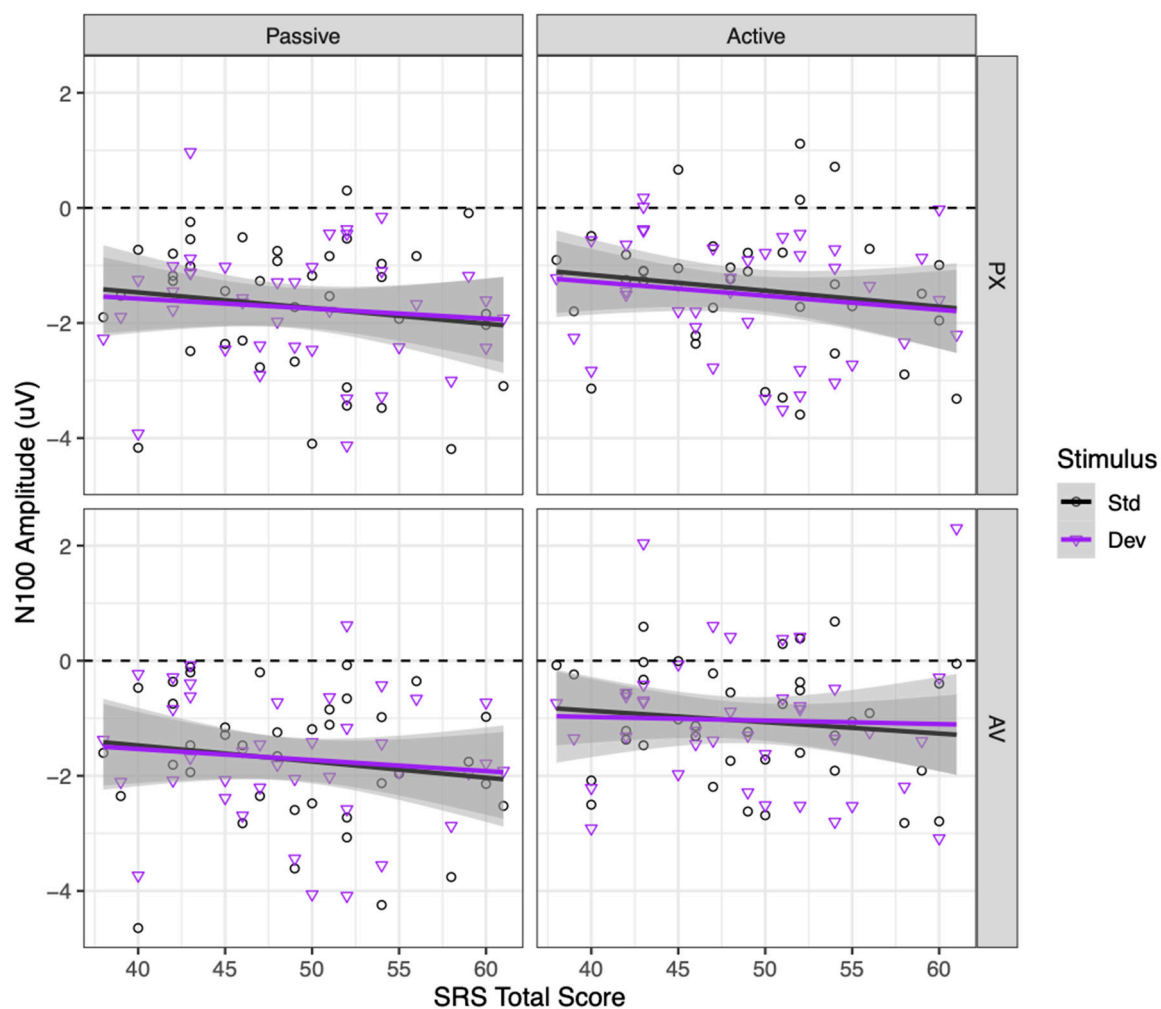

**Figure S1.** Non-significant associations between N100 amplitudes and SRS-2 scores. Each point represents one participant's average component amplitude in one condition. Error ribbon = 95% CI. Correlations shown for visualization purposes only; significance testing was performed using mixed-effects models.
